# Supplementary material
Source: PubMed Central journal article supplement (PMC3195617)
Supplement: supp_M110.205708_jbc.M110.205708-1.pdf [file supp_M110.205708_jbc.M110.205708-1.pdf]

## SUPPLEMENTAL DATA

### Table of Contents

|                                      |                  |
|--------------------------------------|------------------|
| <b>Figure Legends Suppl. Fig 1-3</b> | <b>S-1</b>       |
| <b>Supplemental Figure 1</b>         | <b>S-2</b>       |
| <b>Supplemental Figure 2</b>         | <b>S-3</b>       |
| <b>Supplemental Figure 3</b>         | <b>S-4</b>       |
| <b>Supplemental Table 1</b>          | <b>S-5</b>       |
| <b>Supplemental Table 2</b>          | <b>S-6</b>       |
| <b>Supplemental Table 3</b>          | <b>S-7</b>       |
| <b>Supplemental Table 4</b>          | <b>S-8</b>       |
| <b>Supplemental Table 5</b>          | <b>S-9--S-10</b> |

Suppl. Fig. 1. Tumor necrosis factor- $\alpha$  and ICAM-1 and VCAM-1 expression. (A) HMVEC were exposed to tumor necrosis factor- $\alpha$  (TNF- $\alpha$ ) (20 ng/ml) for 1- 4 h, and ICAM-1 and VCAM-1 mRNA were measured by qRT-PCR (n=3-4) ( $p < 0.0001$  by ANOVA). (B) The effect of TNF- $\alpha$  on GPx-1, ICAM-1, and VCAM-1 protein expression was determined by Western immunoblotting in a time-dependent (n=4-5), and (C) dose-dependent (n=5-6) fashion. Representative blots are shown. Data are presented as mean  $\pm$  SEM. Means were significantly different by ANOVA  $p < 0.05$ . Additionally, pairwise comparison shows  $*p < 0.05$  vs. no treatment.

Suppl. Fig. 2. Role for ROS in TNF- $\alpha$ -mediated activation of endothelial cells. (A) Effect of siRNAs on GPx-1 protein was determined by immunoblot. (B) 48 hrs after transfection, cells were pretreated 1 hr with diphenylene iodonium (DPI), an NADPH oxidase inhibitor, before TNF- $\alpha$  exposure (20 ng/ml). ICAM-1 and VCAM-1 expression was determined by immunoblotting 4 hrs following TNF- $\alpha$  treatment (n=4). Representative blots are shown.

Suppl. Fig. 3. Microarray data analysis. Overview of gene changes in the DUSP family and PTEN using the Affymetrix Human Genome U133A 2.0 gene array in siControl with TNF- $\alpha$  versus non-treated and siGPx-1 with TNF- $\alpha$  versus non-treated cells.

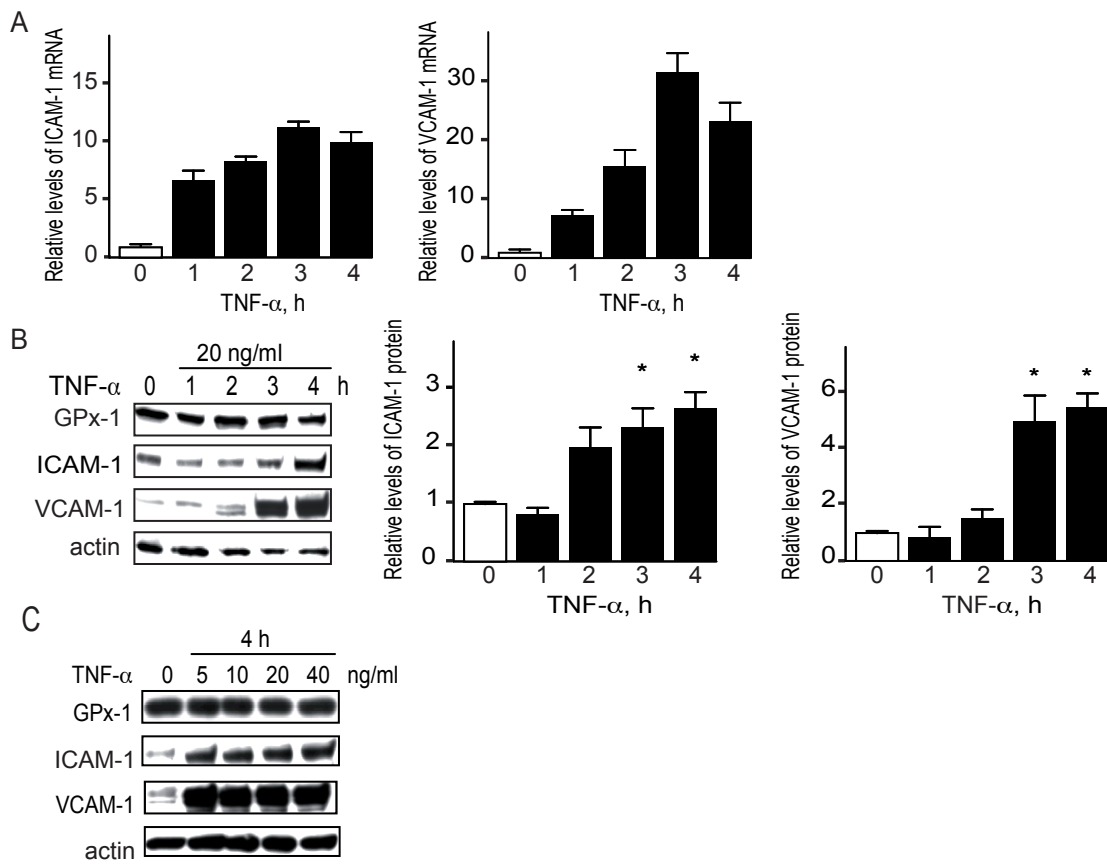

Supplemental Figure 1

A

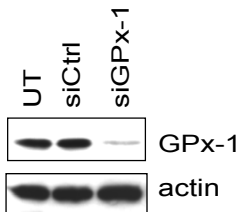

B

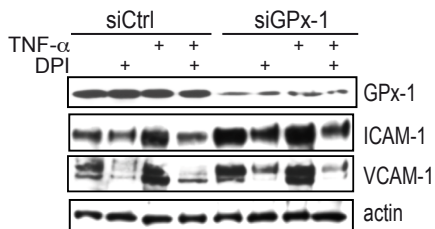

Supplemental figure 2.

S-3

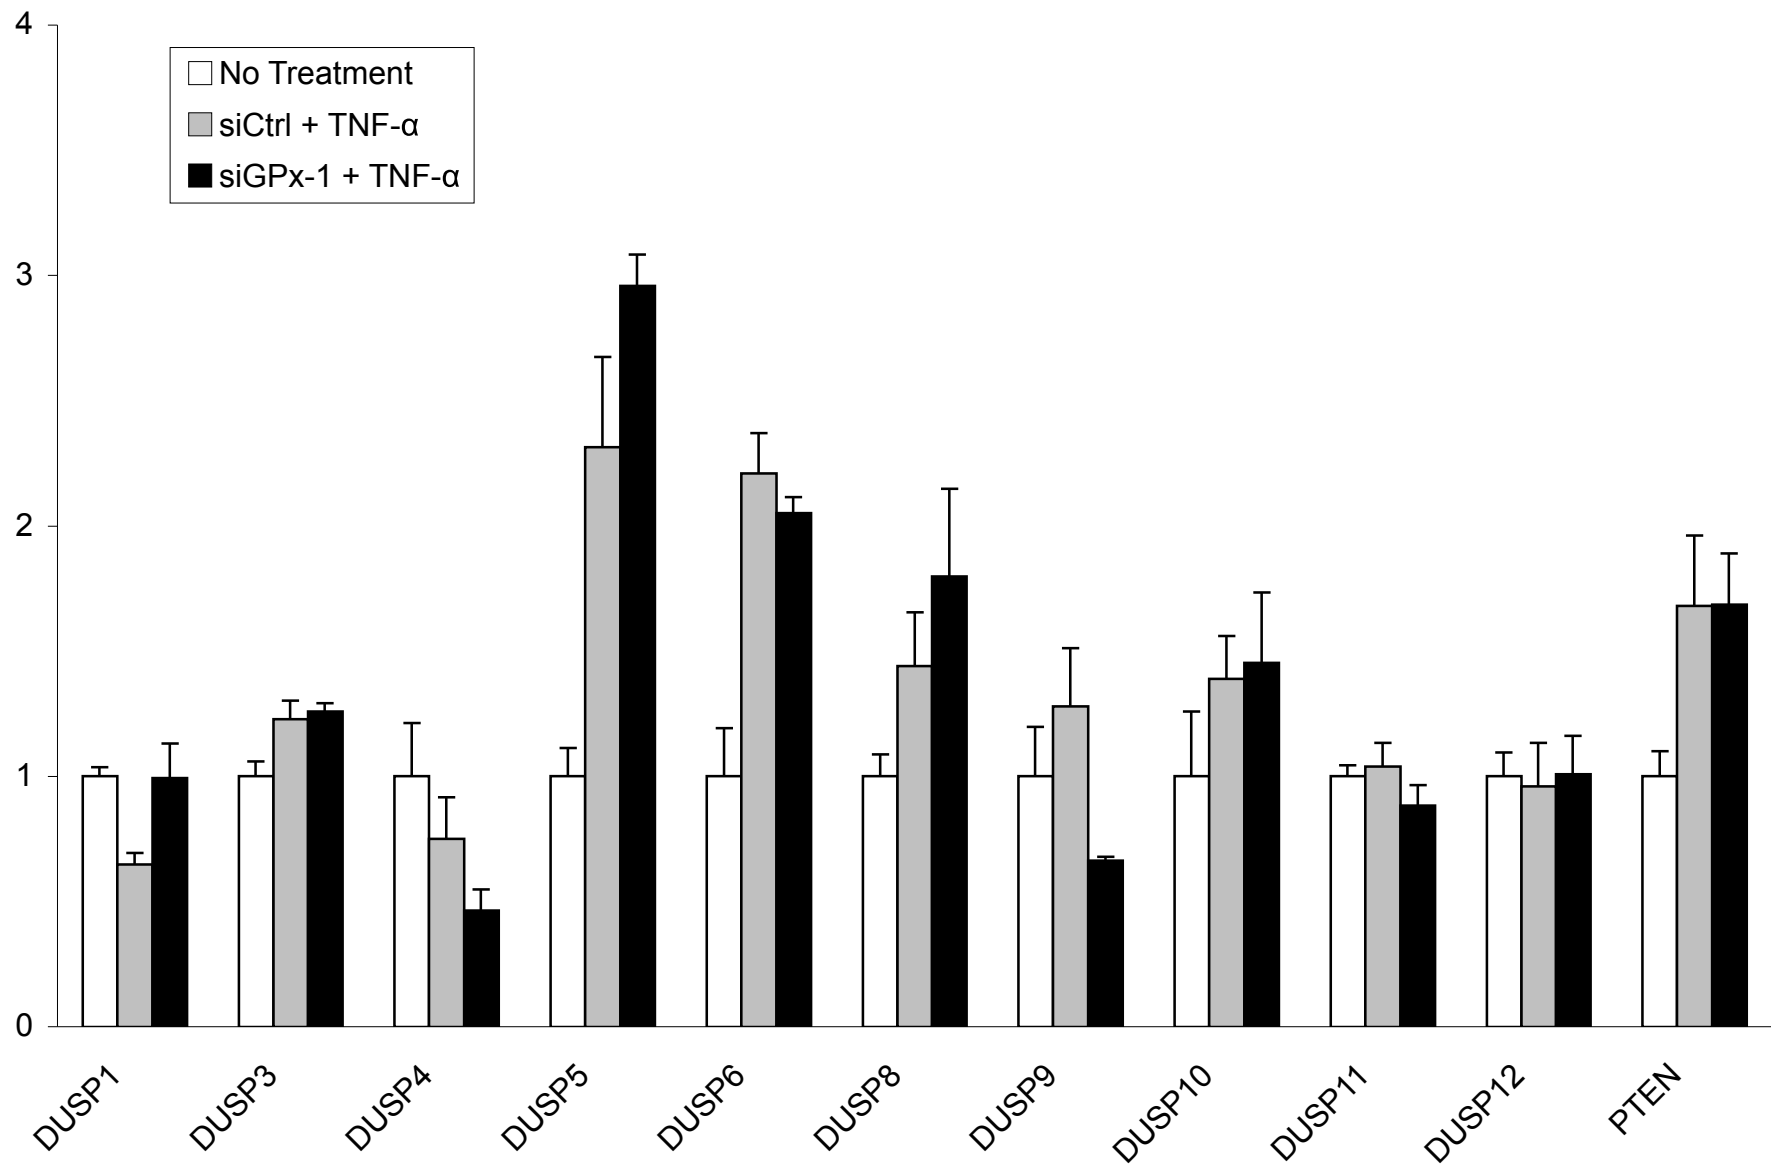

Supplemental Figure 3

Supplementary TABLE 1 Primers for qRT-PCR

|          | Applied Biosystems (Human) | Ref.Sequence                                       |
|----------|----------------------------|----------------------------------------------------|
| GAPDH    | 4333764T                   | NM_002046.3                                        |
| GPx-1    | Hs00829989_gH              | NM_201397.1, NM_000581.2                           |
| ICAM-1   | Hs00164932_m1              | NM_000201.1                                        |
| VCAM-1   | Hs00365485_m1              | NM_080682.1, NM_001078.2                           |
| CD97     | Hs00173542_m1              | NM_078481.2, NM_001025160.1, NM_001784.3           |
| TNFRSF1B | Hs00153550_m1              | NM_001066                                          |
| TAK1     | Hs00177373_m1              | NM_145333.1, NM_145331.1, NM_145332.1, NM_003188.2 |
| NFkB1    | Hs00231653_m1              | NM_003998.2                                        |
| NFkB2    | Hs00174517_m1              | NM_001077493.1, NM_001077494.1 NM_002502.3         |
| MAPK1    | Hs00177066_m1              | NM_138957.2, NM_002745.4                           |
| CCND3    | Hs00236949_m1              | NM_001760.2                                        |
| DUSP4    | Hs00154826_m1              | NM_001394.5                                        |
|          | Applied Biosystems (Mouse) |                                                    |
| GAPDH    | Mm99999915_g1              | NM_008084.2                                        |
| GPx-1    | Mm00656767_g1              | NM_008160.5                                        |

Supplemental TABLE 2. Validation of microarray data by using qRT-PCR

| Gene Symbol | Microarray      |                        |                         |               | qRT-PCR         |                        |                         |               |
|-------------|-----------------|------------------------|-------------------------|---------------|-----------------|------------------------|-------------------------|---------------|
|             | No Treatment    | siCtrl + TNF- $\alpha$ | siGPx-1 + TNF- $\alpha$ | ANOVA p-value | No Treatment    | siCtrl + TNF- $\alpha$ | siGPx-1 + TNF- $\alpha$ | ANOVA p-value |
| GPx-1       | 1.00 $\pm$ 0.03 | 1.13 $\pm$ 0.01        | 0.02 $\pm$ 0.00         | <0.0001       | 1.00 $\pm$ 0.00 | 1.13 $\pm$ 0.07        | 0.03 $\pm$ 0.00         | <0.0001       |
| ICAM-1      | 1.00 $\pm$ 0.04 | 3.59 $\pm$ 0.09        | 4.37 $\pm$ 0.17         | <0.0001       | 1.00 $\pm$ 0.00 | 5.62 $\pm$ 0.23        | 11.44 $\pm$ 0.69        | <0.0001       |
| VCAM-1      | 1.00 $\pm$ 0.01 | 4.31 $\pm$ 0.08        | 3.84 $\pm$ 0.21         | <0.0001       | 1.01 $\pm$ 0.04 | 18.16 $\pm$ 0.61       | 21.79 $\pm$ 0.41        | <0.0001       |
| CD97        | 1.00 $\pm$ 0.11 | 1.44 $\pm$ 0.53        | 2.71 $\pm$ 0.36         | 0.04          | 1.11 $\pm$ 0.01 | 0.85 $\pm$ 0.29        | 2.72 $\pm$ 0.33         | 0.004         |
| TNFRSF1B    | 1.00 $\pm$ 0.14 | 2.05 $\pm$ 0.10        | 1.25 $\pm$ 0.06         | 0.001         | 1.00 $\pm$ 0.00 | 2.03 $\pm$ 0.29        | 1.39 $\pm$ 0.15         | 0.02          |
| TAK1        | 1.00 $\pm$ 0.08 | 1.15 $\pm$ 0.08        | 1.10 $\pm$ 0.04         | 0.38          | 1.00 $\pm$ 0.00 | 1.27 $\pm$ 0.08        | 1.26 $\pm$ 0.16         | 0.20          |
| NFKB2       | 1.00 $\pm$ 0.08 | 3.98 $\pm$ 0.30        | 3.72 $\pm$ 0.09         | <0.0001       | 1.00 $\pm$ 0.00 | 2.93 $\pm$ 0.79        | 2.98 $\pm$ 0.30         | 0.046         |
| MAPK1       | 1.00 $\pm$ 0.04 | 0.93 $\pm$ 0.02        | 0.86 $\pm$ 0.04         | 0.06          | 1.00 $\pm$ 0.00 | 1.09 $\pm$ 0.18        | 1.01 $\pm$ 0.07         | 0.84          |
| CCND3       | 1.00 $\pm$ 0.03 | 1.05 $\pm$ 0.05        | 0.33 $\pm$ 0.02         | <0.0001       | 1.03 $\pm$ 0.04 | 0.99 $\pm$ 0.18        | 0.22 $\pm$ 0.02         | 0.002         |
| DUSP4       | 1.00 $\pm$ 0.12 | 0.75 $\pm$ 0.10        | 0.45 $\pm$ 0.04         | 0.02          | 1.03 $\pm$ 0.06 | 0.85 $\pm$ 0.16        | 0.40 $\pm$ 0.06         | 0.01          |

| Gene Symbol | qRT-PCR         |                           |                         |               |
|-------------|-----------------|---------------------------|-------------------------|---------------|
|             | No Treatment    | Ad5Bgl II + TNF- $\alpha$ | AdGPx-1 + TNF- $\alpha$ | ANOVA p-value |
| GPx-1       | 1.00 $\pm$ 0.00 | 0.58 $\pm$ 0.06           | 95.47 $\pm$ 11.86       | <0.0001       |
| ICAM-1      | 1.00 $\pm$ 0.00 | 14.80 $\pm$ 1.32          | 7.59 $\pm$ 2.14         | 0.002         |
| VCAM-1      | 1.00 $\pm$ 0.00 | 12.37 $\pm$ 0.87          | 3.57 $\pm$ 0.32         | <0.0001       |
| CD97        | 1.00 $\pm$ 0.00 | 0.63 $\pm$ 0.07           | 0.20 $\pm$ 0.07         | 0.0002        |
| TNFRSF1B    | 1.00 $\pm$ 0.00 | 0.57 $\pm$ 0.02           | 0.49 $\pm$ 0.17         | 0.02          |
| TAK1        | 1.00 $\pm$ 0.00 | 0.81 $\pm$ 0.13           | 0.69 $\pm$ 0.23         | 0.40          |
| NFKB2       | 1.00 $\pm$ 0.00 | 2.30 $\pm$ 0.32           | 1.39 $\pm$ 0.50         | 0.09          |
| MAPK1       | 1.00 $\pm$ 0.00 | 0.65 $\pm$ 0.10           | 0.47 $\pm$ 0.14         | 0.02          |
| CCND3       | 1.00 $\pm$ 0.00 | 0.83 $\pm$ 0.13           | 0.73 $\pm$ 0.29         | 0.60          |

Supplementary TABLE 3. GSEA-leading edge genes upregulated in siGPX-1 plus TNF- $\alpha$  compared to siControl plus TNF- $\alpha$

| Gene Symbol | Description                                                       | GPx-1 >Control <sup>a</sup><br>Fold Change | GPx-1>NT <sup>b</sup><br>Fold Change | GPx-1=NT <sup>c</sup><br>Fold Change | GPx-1<NT <sup>d</sup><br>Fold Change |
|-------------|-------------------------------------------------------------------|--------------------------------------------|--------------------------------------|--------------------------------------|--------------------------------------|
| CD14        | CD 14 molecule                                                    | 6.83                                       | 4.91                                 |                                      |                                      |
| DTNA        | Dystrobrevin, alpha                                               | 6.06                                       | 1.80                                 |                                      |                                      |
| PTPN22      | Protein tyrosine phosphatase, non-receptor type 22                | 4.10                                       |                                      |                                      | 5.21                                 |
| DYNLT1      | Dynein, light chain, Tctex-type 1                                 | 3.82                                       |                                      | 1.13                                 |                                      |
| AP3S1       | Adaptor-related protein complex 3, sigma 1 subunit                | 2.83                                       |                                      |                                      | 1.94                                 |
| API5        | Apoptosis inhibitor 5                                             | 2.73                                       | 1.46                                 |                                      |                                      |
| IGFBP5      | Insulin-like growth factor binding protein 5                      | 2.61                                       |                                      | 1.13                                 |                                      |
| ETNK1       | Ethanolamine kinase 1                                             | 2.06                                       | 1.39                                 |                                      |                                      |
| MLLT11      | Myeloid/lymphoid or mixed-lineage leukemia,<br>translocated to 11 | 2.01                                       |                                      | 1.19                                 |                                      |
| IL1A        | Interleukin-1, alpha                                              | 1.93                                       | 4.74                                 |                                      |                                      |
| CD97        | CD 97 molecule                                                    | 1.88                                       | 2.71                                 |                                      |                                      |
| GZMA        | Granzyme A                                                        | 1.88                                       |                                      | 1.02                                 |                                      |

<sup>a</sup> Fold change of genes upregulated in siGPx-1 plus TNF compared to siControl plus TNF- $\alpha$ .

<sup>b</sup> Fold change of genes that are upregulated in siGPx-1 plus TNF compared to no treatment (NT).

<sup>c</sup> Fold change of genes that are not different between siGPx plus TNF compared to no treatment.

<sup>d</sup> Fold change of genes that are more highly expressed in no treatment conditions compared to siGPx-1 plus TNF- $\alpha$ .

Supplementary TABLE 4. GSEA leading edge genes downregulated in siGPx-1 plus TNF- $\alpha$  compared to siControl plus TNF- $\alpha$ <sup>a</sup>

| Gene Symbol | Description                                               | Control >GPx-1 <sup>b</sup><br>Fold Change | Control>NT <sup>c</sup><br>Fold Change | Control=NT <sup>d</sup><br>Fold Change | Control<NT <sup>d</sup><br>Fold Change |
|-------------|-----------------------------------------------------------|--------------------------------------------|----------------------------------------|----------------------------------------|----------------------------------------|
| GPx-1       | Glutathione peroxidase 1                                  | 59.48                                      |                                        | 1.13                                   |                                        |
| CRIP1       | Cysteine-rich protein 1                                   | 8.28                                       |                                        | 1.18                                   |                                        |
| NR4A3       | Nuclear receptor subfamily 4, group A, member 3           | 6.92                                       | 16.67                                  |                                        |                                        |
| SF3A2       | Splicing factor 3a, subunit 22, 66 kDa                    | 5.93                                       |                                        | 1.12                                   |                                        |
| SLC11A1     | Solute carrier family 11, member 1                        | 5.03                                       | 4.49                                   |                                        |                                        |
| TGM2        | Transglutaminase 2                                        | 4.81                                       |                                        | 1.14                                   |                                        |
| GPR65       | G protein-coupled receptor 65                             | 4.31                                       | 1.27                                   |                                        |                                        |
| METTL7A     | Methyltransferase like 7A                                 | 4.26                                       | 1.65                                   |                                        |                                        |
| ABAT        | 4-aminobutyrate aminotransferase                          | 3.92                                       | 2.07                                   |                                        |                                        |
| AHSG        | Alpha-2-Hs-glycoprotein                                   | 3.91                                       |                                        |                                        | 1.33                                   |
| STARD7      | StAR-related lipid transfer (START) domain containing 7   | 3.85                                       |                                        | 1.13                                   |                                        |
| GPx-3       | Glutathione peroxidase 3                                  | 3.82                                       | 1.51                                   |                                        |                                        |
| PDE1A       | Phosphodiesterase 1A, calmodulin-dependent                | 3.42                                       | 2.88                                   |                                        |                                        |
| DUSP4       | Dual specificity phosphatase 4                            | 3.32                                       |                                        |                                        | 1.34                                   |
| UST         | Uronyl-2-sulfotransferase                                 | 3.31                                       |                                        | 1.19                                   |                                        |
| SELL        | Selectin L                                                | 3.18                                       | 2.80                                   |                                        |                                        |
| CCND3       | Cyclin D3                                                 | 3.13                                       |                                        | 1.19                                   |                                        |
| POLR3K      | Polymerase (RNA) III (DNA direct) polypeptide K, 12.3 kDa | 2.93                                       |                                        |                                        | 1.65                                   |
| MKI67       | Antigen identified by monoclonal antibody Ki-67           | 2.72                                       |                                        |                                        | 1.92                                   |
| CEBPD       | CCAAT/enhancer binding protein (C/EBP), delta             | 2.75                                       | 36.03                                  |                                        |                                        |
| RGS4        | Regulator of G-protein signaling 4                        | 2.49                                       |                                        |                                        | 3.45                                   |
| CKS1B       | CDC28 protein kinase regulatory subunit 1B                | 2.48                                       |                                        |                                        | 1.63                                   |
| NR4A2       | Nuclear receptor subfamily 4, group A, member 2           | 2.37                                       | 6.72                                   |                                        |                                        |
| RRM2        | Ribonucleotide reductase M2 polypeptide                   | 2.28                                       |                                        |                                        | 3.18                                   |
| SERPINA3    | Serpin peptidase inhibitor, clade A, member 3             | 2.23                                       | 12.68                                  |                                        |                                        |
| CENPE       | Centromere protein E                                      | 2.20                                       |                                        |                                        | 1.82                                   |

<sup>a</sup> An additional 45 genes downregulated between 1.8 and 2.2-fold are not listed.

<sup>b</sup> Fold change of genes that are upregulated in siControl plus TNF- $\alpha$  compared to siGPx-1 plus TNF- $\alpha$ . <sup>c</sup> Fold change of genes that are upregulated in siControl plus TNF- $\alpha$  compared to no treatment (NT).

<sup>c</sup> Fold change of genes that are not statistically different and between siControl plus TNF- $\alpha$  compared to no treatment.

<sup>e</sup> Fold change of genes that are more highly expressed.



Supplementary TABLE 5. Microarray data of antioxidant genes

| Gene Symbol                               | Microarray      |                           |                            | ANOVA<br>p-value |
|-------------------------------------------|-----------------|---------------------------|----------------------------|------------------|
|                                           | No Treatment    | siCtrl +<br>TNF- $\alpha$ | siGPx-1 +<br>TNF- $\alpha$ |                  |
| <i>Heme oxygenase (HMOX)</i>              |                 |                           |                            |                  |
| HMOX-1                                    | 1.00 $\pm$ 0.01 | 0.95 $\pm$ 0.02           | 0.44 $\pm$ 0.02            | <0.0001          |
| HMOX-2                                    | 1.00 $\pm$ 0.12 | 0.84 $\pm$ 0.14           | 0.86 $\pm$ 0.09            | 0.54             |
| <i>Superoxide dismutase (SOD)</i>         |                 |                           |                            |                  |
| SOD-1                                     | 1.00 $\pm$ 0.02 | 1.19 $\pm$ 0.04           | 1.13 $\pm$ 0.05            | 0.03             |
| SOD-2                                     | 1.00 $\pm$ 0.03 | 6.52 $\pm$ 0.25           | 6.56 $\pm$ 0.25            | <0.0001          |
| <i>Glutathione peroxidase (GPx)</i>       |                 |                           |                            |                  |
| Non-selenium GPx                          | 1.00 $\pm$ 0.06 | 0.78 $\pm$ 0.02           | 0.65 $\pm$ 0.03            | 0.002            |
| GPx-3                                     | 1.00 $\pm$ 0.03 | 1.18 $\pm$ 0.06           | 0.55 $\pm$ 0.05            | 0.0002           |
| GPx-4                                     | 1.00 $\pm$ 0.01 | 1.42 $\pm$ 0.01           | 1.33 $\pm$ 0.01            | <0.0001          |
| GPx-5                                     | 1.00 $\pm$ 0.42 | 0.29 $\pm$ 0.08           | 1.68 $\pm$ 0.10            | 0.02             |
| <i>Glutathione S-transferase (GST)</i>    |                 |                           |                            |                  |
| GST                                       | 1.00 $\pm$ 0.14 | 1.04 $\pm$ 0.03           | 1.08 $\pm$ 0.17            | 0.09             |
| GST subunit-4                             | 1.00 $\pm$ 0.12 | 1.44 $\pm$ 0.16           | 1.10 $\pm$ 0.08            | 0.10             |
| GST subunit-13                            | 1.00 $\pm$ 0.05 | 1.05 $\pm$ 0.03           | 1.04 $\pm$ 0.04            | 0.61             |
| GSTA4                                     | 1.00 $\pm$ 0.01 | 0.73 $\pm$ 0.05           | 0.88 $\pm$ 0.04            | 0.009            |
| GSTM1                                     | 1.00 $\pm$ 0.04 | 1.29 $\pm$ 0.04           | 1.24 $\pm$ 0.05            | 0.006            |
| GSTM2                                     | 1.00 $\pm$ 0.05 | 1.25 $\pm$ 0.05           | 1.01 $\pm$ 0.11            | 0.09             |
| GSTM3                                     | 1.00 $\pm$ 0.07 | 1.05 $\pm$ 0.02           | 0.79 $\pm$ 0.01            | 0.01             |
| GSTM4                                     | 1.00 $\pm$ 0.07 | 0.87 $\pm$ 0.05           | 1.17 $\pm$ 0.08            | 0.06             |
| GSTM5                                     | 1.00 $\pm$ 0.13 | 0.99 $\pm$ 0.17           | 0.76 $\pm$ 0.12            | 0.46             |
| GST like                                  | 1.00 $\pm$ 0.04 | 0.98 $\pm$ 0.03           | 1.14 $\pm$ 0.05            | 0.06             |
| GST theta-1                               | 1.00 $\pm$ 0.06 | 1.30 $\pm$ 0.03           | 0.95 $\pm$ 0.03            | 0.002            |
| GST theta-2                               | 1.00 $\pm$ 0.19 | 1.12 $\pm$ 0.07           | 1.02 $\pm$ 0.03            | 0.78             |
| GST pi                                    | 1.00 $\pm$ 0.07 | 0.90 $\pm$ 0.03           | 1.11 $\pm$ 0.05            | 0.07             |
| GST zeta-1                                | 1.00 $\pm$ 0.05 | 0.83 $\pm$ 0.01           | 0.64 $\pm$ 0.02            | 0.0007           |
| Microsomal GST-2                          | 1.00 $\pm$ 0.05 | 1.22 $\pm$ 0.04           | 1.26 $\pm$ 0.05            | 0.016            |
| Microsomal GST-3                          | 1.00 $\pm$ 0.04 | 1.18 $\pm$ 0.05           | 1.27 $\pm$ 0.02            | 0.006            |
| <i>Glutathione synthetase (GSS)</i>       | 1.00 $\pm$ 0.01 | 0.80 $\pm$ 0.05           | 0.73 $\pm$ 0.07            | 0.016            |
| <i>Glutathione reductase (GSH-R)</i>      | 1.00 $\pm$ 0.12 | 1.08 $\pm$ 0.05           | 0.93 $\pm$ 0.04            | 0.45             |
| <i>Thioredoxin</i>                        |                 |                           |                            |                  |
| Thioredoxin                               | 1.00 $\pm$ 0.01 | 0.98 $\pm$ 0.03           | 0.94 $\pm$ 0.02            | 0.23             |
| Thioredoxin-2                             | 1.00 $\pm$ 0.09 | 1.15 $\pm$ 0.09           | 1.02 $\pm$ 0.07            | 0.43             |
| Thioredoxin-like                          | 1.00 $\pm$ 0.03 | 1.20 $\pm$ 0.04           | 1.13 $\pm$ 0.02            | 0.009            |
| Thioredoxin delta-3                       | 1.00 $\pm$ 0.33 | 0.93 $\pm$ 0.14           | 1.18 $\pm$ 0.25            | 0.77             |
| Thioredoxin reductase-1                   | 1.00 $\pm$ 0.10 | 0.68 $\pm$ 0.04           | 0.78 $\pm$ 0.03            | 0.03             |
| Thioredoxin reductase, mitochondrial      | 1.00 $\pm$ 0.01 | 1.10 $\pm$ 0.23           | 0.90 $\pm$ 0.23            | 0.77             |
| Thioredoxin reductase II beta             | 1.00 $\pm$ 0.07 | 0.96 $\pm$ 0.12           | 0.84 $\pm$ 0.03            | 0.39             |
| Thioredoxin-related transmembrane protein | 1.00 $\pm$ 0.21 | 0.62 $\pm$ 0.04           | 0.97 $\pm$ 0.05            | 0.14             |
| Thioredoxin peroxidase                    | 1.00 $\pm$ 0.01 | 0.93 $\pm$ 0.03           | 0.94 $\pm$ 0.01            | 0.09             |
| <i>Catalase</i>                           | 1.00 $\pm$ 0.02 | 0.93 $\pm$ 0.04           | 0.78 $\pm$ 0.02            | 0.005            |
| <i>UDP-glucose dehydrogenase</i>          | 1.00 $\pm$ 0.01 | 0.64 $\pm$ 0.05           | 0.67 $\pm$ 0.03            | 0.0006           |
| <i>Glucose-6-phosphate dehydrogenase</i>  | 1.00 $\pm$ 0.04 | 0.78 $\pm$ 0.04           | 0.68 $\pm$ 0.05            | 0.006            |
| <i>NADPH oxidase-4</i>                    | 1.00 $\pm$ 0.06 | 0.73 $\pm$ 0.02           | 0.94 $\pm$ 0.05            | 0.017            |
| <i>Uncoupling protein-2</i>               | 1.00 $\pm$ 0.10 | 0.97 $\pm$ 0.12           | 0.55 $\pm$ 0.02            | 0.02             |

|                                           |             |             |             |        |
|-------------------------------------------|-------------|-------------|-------------|--------|
| <i>Uncoupling protein homolog</i>         | 1.00 ± 0.03 | 0.97 ± 0.04 | 0.47 ± 0.05 | 0.0002 |
| <i>Mitochondrial uncoupling protein-5</i> | 1.00 ± 0.08 | 0.91 ± 0.04 | 1.15 ± 0.07 | 0.097  |
| <i>Peroxiredoxin-2</i>                    | 1.00 ± 0.07 | 0.85 ± 0.09 | 0.90 ± 0.12 | 0.56   |
| <i>Peroxiredoxin-3</i>                    | 1.00 ± 0.05 | 0.79 ± 0.05 | 0.90 ± 0.04 | 0.05   |
